# Supplementary material for: Pathogenic/likely pathogenic variants in theSHOX,GHRandIGFALSgenes among Indian children with idiopathic short stature
Source: publisher site journal article supplement (doi:10.1515/jpem-2019-0234), 2019-12-13
Supplement: Supplementary file 1 [file jpem-2019-0234_suppl.docx]

**Supplementary table1:** Primers for exons 2–6 of *SHOX* gene

| **Exon** | **Oligo sequences** | **Product size (base pairs)** | **Annealing temperature** |
| --- | --- | --- | --- |
| SHOX 2F | ATAACAGCGCTGGTGATCCA | 492 | 67°C |
| SHOX 2R | AGACGGGAGCTGCAAATGT |
| SHOX 3F | GTCAAAGCGCATTGGTTTTC | 495 | 65°C |
| SHOX 3R | CTCAGGCGTCTCCAAAAGTC |
| SHOX 4,5F | CTCCCAGCTCCCAGAGGT | 485 | 65°C |
| SHOX 4,5R | GGCAGGGAGGGACTAGGAGT |
| SHOX 6F | GCTCCCTAGGGGAGAAGAGG | 434 | 59.5°C |
| SHOX 6R | CGGGGTTGAGTGCAGGAC |

**Supplementary table 2:** Primers for exons 2–10 of *GHR*

| **Exon** | **Oligo sequences** | **Product size (bp)** | **Annealing temperature** |
| --- | --- | --- | --- |
| GHR 2F | TGGTCTGCTTTTAATTGCTGG | 169 | 59°C |
| GHR 2R | CAAAACACTGAGGGTGGAAATGG |
| GHR 3F | TACACAGGGTCATATCAGATTG | 240 | 56°C |
| GHR 3R | CTATTCCAGTTACTACCATCCC |
| GHR 4F | ATATGACTCACCTGATTTCATGC | 225 | 58°C |
| GHR 4R | TAGGTACATCCATGGAGAGGAA |
| GHR 5F | GCTACAACATGATTTTTGGAACAA | 276 | 57°C |
| GHR 5R | CATTTATTTAGTCTAAAACTATGTCA |
| GHR 6F | AATATTAAATTGTGTCTGTCTGTGT | 268 | 60°C |
| GHR 6R | GAAAGAAAAGTCAAAGTGTAAGGT |
| GHR 7F | TTGAGTTGTTGACTCTTTGGCC | 274 | 60°C |
| GHR 7R | AACTGTTATATTGACAAAAGCC |
| GHR 8F | TAAACTGTGCTTCAACTATTC | 188 | 50°C |
| GHR 8R | AACTGGTACAAAATACCAA |
| GHR 9F | GACAGGAGTCTTCAGGTGTTAA | 191 | 57 °C |
| GHR 9R | AGAATATGTAGCTTTTAAGATGTCA |
| GHR 10.1F | GAGTTTCTTTTCATAGATCTTC | 349 | 53°C |
| GHR 10.1R | TTAACCTCTGTGGCTGAG |
| GHR 10.2 F | ACATGAGGGTACCTCAGA | 396 | 51°C |
| GHR 10.2 R | CAGAAGTAGGCATTGTCC |
| GHR 10.3 F | GGAAATGGTCTCACTCTG | 375 | 62°C |
| GHR 10.3 R | CCAAAGAAAGGCTAAGGC |

**Supplementary table 3:** Primers for exons 1- 2 of *IGFALS*

| **Exon** | **Oligo sequences** | **Product size (bp)** | **Annealing temperature** |
| --- | --- | --- | --- |
| IGFALS 1F | ACGAGGGGGTTAACAGAGC | 294 | 63°C |
| IGFALS 1R | GCAGACCCCCAGAGCTGA |
| IGFALS 2.1F | ACCGGCTTCTTCGCATCT | 493 | 65°C |
| IGFALS 2.1R | CACAGGTTCTCTAGGCCCAG |
| IGFALS 2.2F | CTTCCAGAACCTCTCCAGCC | 493 | 67°C |
| IGFALS 2.2R | CACGGCAGCGATGAGGTT |
| IGFALS 2.3F | CCATCAAGGCAAACGTGTTC | 437 | 67°C |
| IGFALS 2.3R | AAGGTTCCGGAGACAGTTCC |
| IGFALS 2.4F | TAGACCACAACCAGCTCCAG | 485 | 67°C |
| IGFALS 2.4R | CCCCAGTGGTGCCAAGAG |
| IGFALS 2.5F | GAGTACCTGCTGCTCTCCC | 469 | 67°C |
| IGFALS 2.5R | CTGAGTCCGGGGCTTGAG |

**
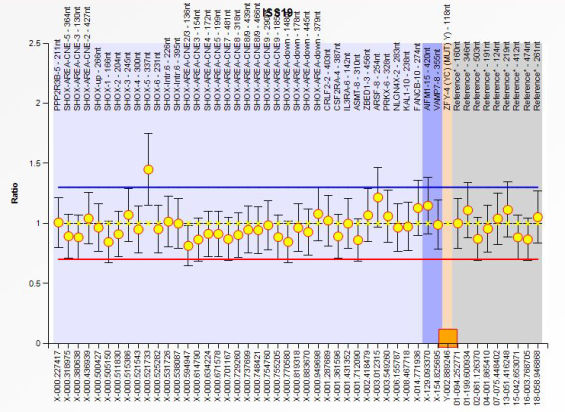

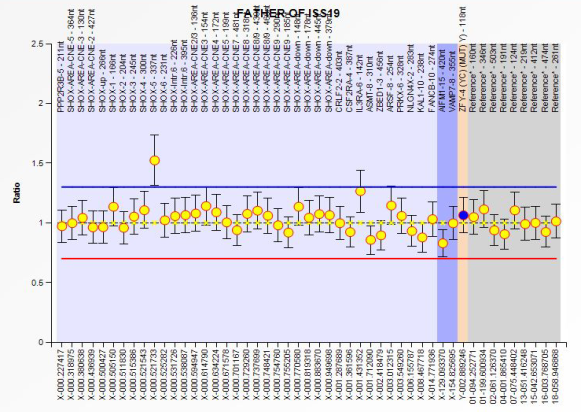
**

(1B)

(1A)


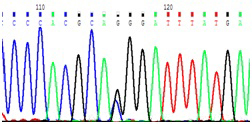
 ***
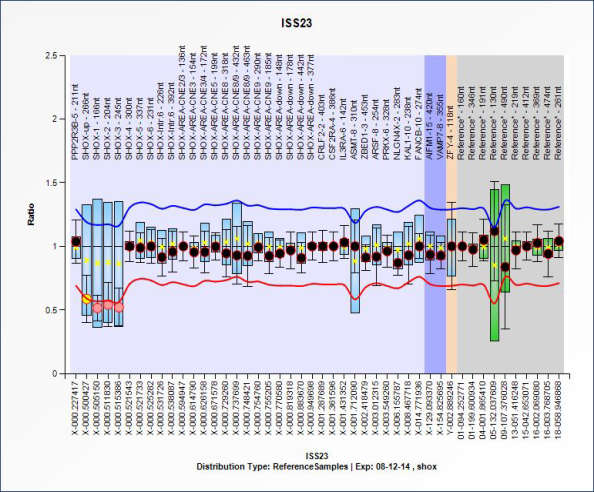
***

(1D)

(1C)


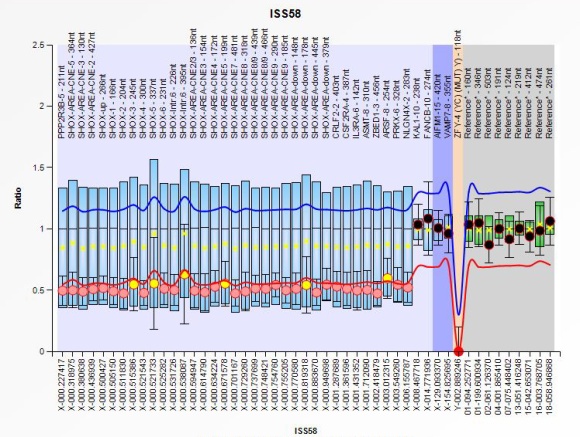

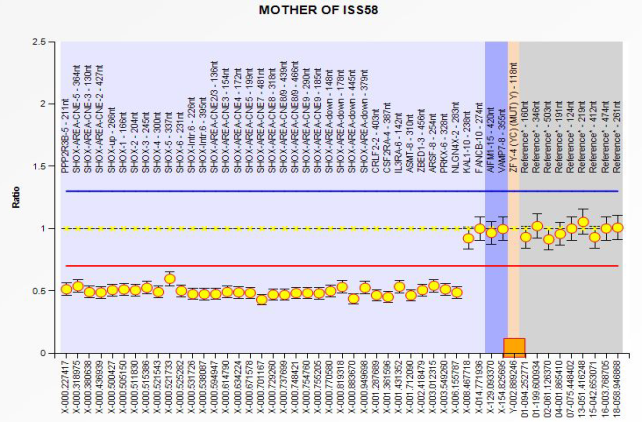


(1F)

(1E)

**Supplementary figure1**: MLPA analysis picture of (1A) ISS 19, and (1B) Father of ISS19, respectively showing duplication of exon 5 of *SHOX* gene; (1C) Sequence chromatogram for c.278-1G>C pathogenic variant of the *SHOX* gene of ISS 20; (1D) MLPA analysis picture of ISS 23 showing partial heterozygous deletion including the upstream *SHOX* region LOC159015 and exons 1, 2 and 3; (1E and 1F ) MLPA analysis picture of ISS 58, and her mother showing complete heterozygous deletion of *SHOX* gene which extended beyond pseudoautosomal region (PAR1) up to *NLGN4X* (Neuroligin 4X) gene
